# Supplementary material for: Trace Elements in Sediments of Rivers Affected by Brown Coal Mining: A Potential Environmental Hazard
Source: MDPI journal article supplement (doi:10.3390/en15082828), 2022-04-13
Supplement: s1 [file s1]

**Table S1. The classes of pollution and potential ecological risk**

| Pollution assessment                                             |                                                               |                                                                                                        |                                                                                |
|------------------------------------------------------------------|---------------------------------------------------------------|--------------------------------------------------------------------------------------------------------|--------------------------------------------------------------------------------|
| Index                                                            | Formula                                                       | Classes of contamination                                                                               | Contamination Degree                                                           |
| Contamination factor (CF)<br>[34]                                | $CF_i = \frac{C_i}{B_i}$                                      | $CF_i < 1$<br>$1 \leq CF_i < 3$<br>$3 \leq CF_i < 6$<br>$CF_i \geq 6$                                  | Low<br>Moderate<br>Considerable<br>Very high                                   |
| Pollution load index (PLI)<br>[35]                               | $PLI = \sqrt[n]{\prod_{i=1}^n CF_i}$                          | $PLI < 1$<br>$PLI > 1$                                                                                 | Unpolluted<br>Polluted                                                         |
| Nemerow multi-factor index (PI)<br>[36]                          | $PI = \sqrt{\frac{(CF_{i\max})^2 + (CF_{i\text{ave}})^2}{2}}$ | $PI < 1$<br>$1 \leq PI < 2.5$<br>$2.5 \leq PI < 7$<br>$PI \geq 7$                                      | Unpolluted<br>Lowly polluted<br>Moderately polluted<br>Highly polluted<br>[37] |
| Ecological risk assessment                                       |                                                               |                                                                                                        |                                                                                |
| Index                                                            | Formula                                                       | Classes of risk                                                                                        | Potential ecological risk                                                      |
| Potential ecological risk index of the single metal (ER)<br>[38] | $ER_i = TR_i \cdot \frac{C_i}{B_i}$                           | $ER_i < 40$<br>$40 \leq ER_i < 80$<br>$80 \leq ER_i < 160$<br>$160 \leq ER_i < 320$<br>$ER_i \geq 320$ | Low<br>Moderate<br>Considerable<br>High<br>Very high                           |
| Potential ecological risk index (PERI)<br>[38]                   | $PERI = \sum_{i=1}^n ER_i$                                    | $PERI < 150$<br>$150 \leq PERI < 300$<br>$300 \leq PERI < 600$<br>$PERI \geq 600$                      | Low<br>Moderate<br>High<br>Very high                                           |

Symbols description:  $C_i$  is the measured concentration of metal  $i$ ,  $B_i$  is the geochemical background value of metal  $i$ ,  $n$  is the number of heavy metals,  $CF_{i\max}$  is the maximum contamination factor,  $CF_{i\text{ave}}$  is the average contamination factor,  $ER_i$  is the potential ecological risk index of the metal  $i$ ,  $TR_i$  is the toxic response factor for metal  $i$  (Cd = 30, Zn = 1, Cr = 2, Ni = Cu = Pb = 5).
